# Supplementary material for: A Stable Micellar Formulation of RAD001 for Intracerebroventricular Delivery and the Treatment of Alzheimer’s Disease and Other Neurological Disorders
Source: MDPI journal article supplement (doi:10.3390/ijms242417478), 2023-12-14
Supplement: s1 [file s1]

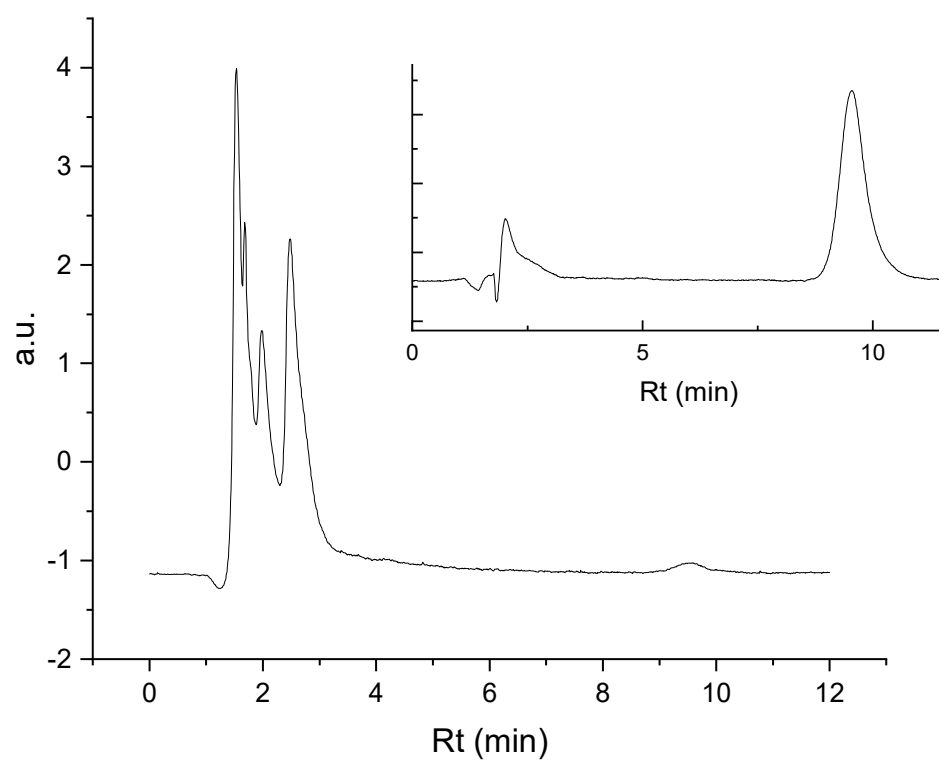

**Figure S1-** HPLC profile of oxidized RAD001. RAD001 was exposed to 30% H<sub>2</sub>O<sub>2</sub> for 24 hours at 37°C. The insert shows the standard RAD001 chromatogram.

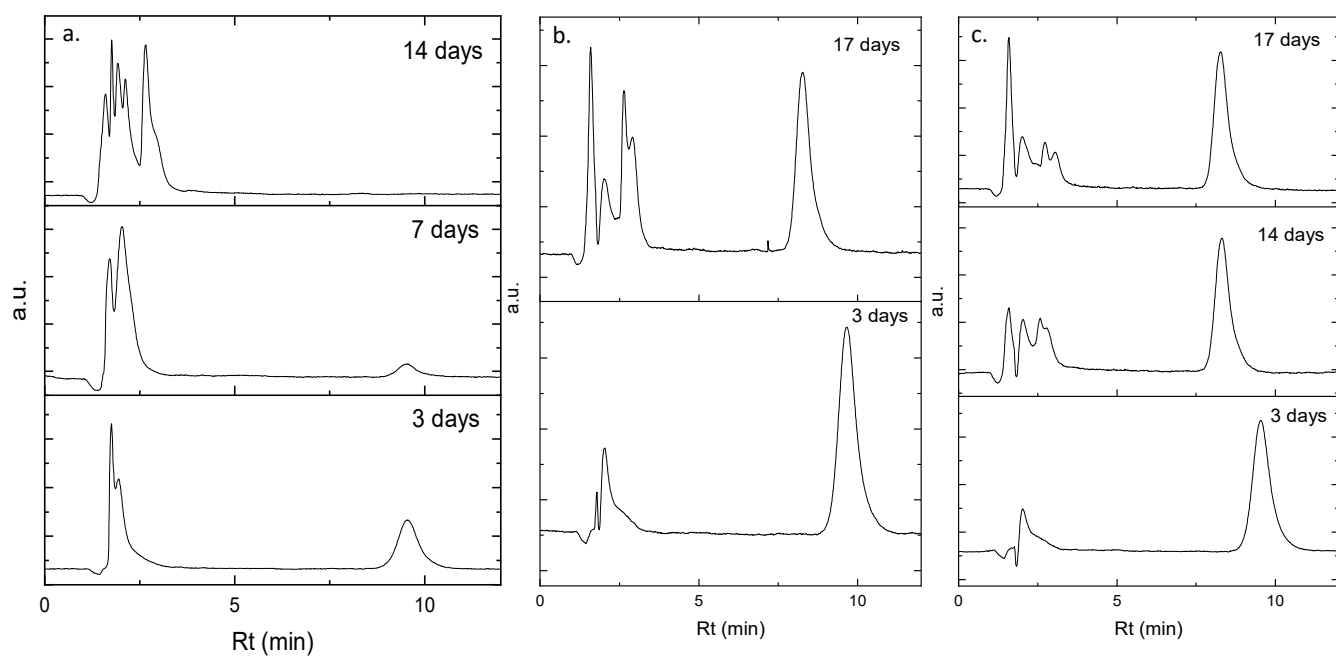

**Figure S2-** HPLC profiles over time of the RAD001 solutions incubated at a. 37°C, b. 25 °C, c. 4 °C.

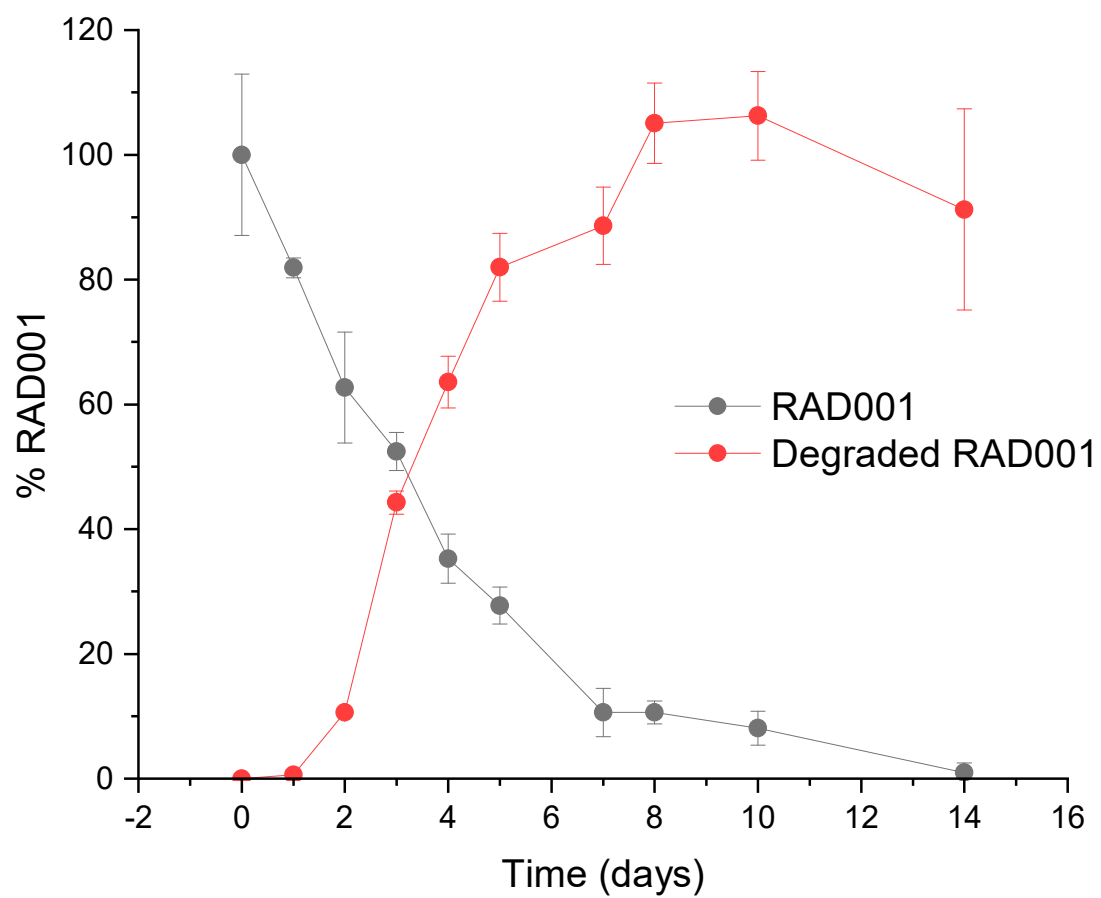

**Figure S3-** RAD001 decay profile in 10%v/v DMSO/physiologic solution in comparison with an overall estimation of degraded RAD001 growth over time at 37 °C.

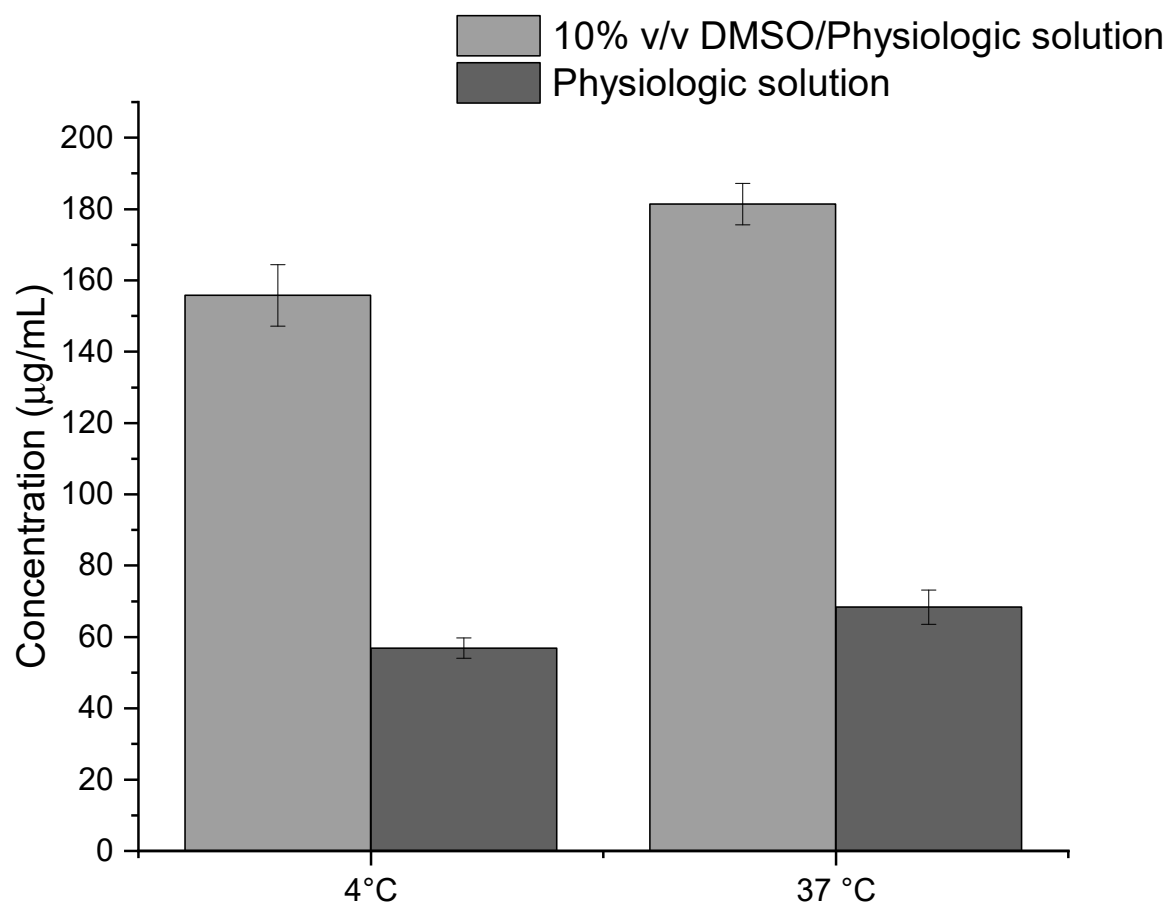

**Figure S4-** Solubility of RAD001 in 10% v/v DMSO/physiologic solutions and physiologic solution at 4 and 37°C. The analysis was performed after incubation of a 2 mg/mL RAD001 suspension for 2 hours.

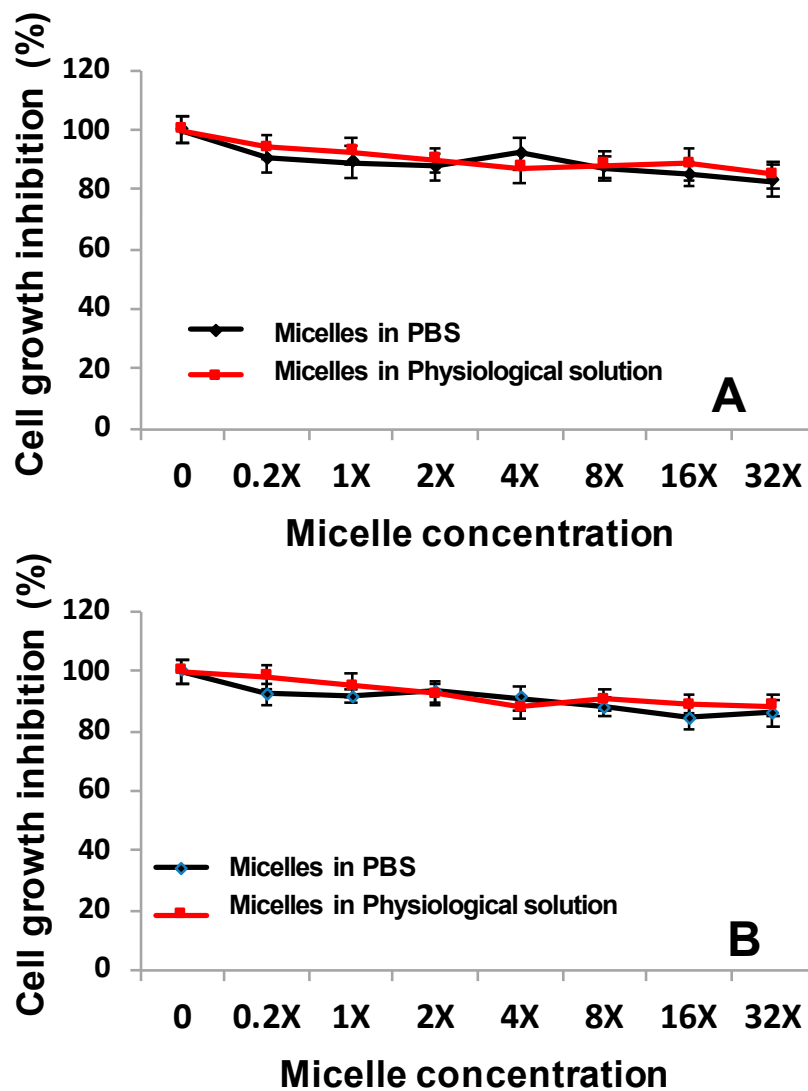

**Figure S5-** HeLa cells were challenged for (A) 24 h and (B) 48 h with increasing scalar concentration of blank DSPE-PEG2000 micelles stored in PBS and physiological solution and analysed by the MTT assay. Cells were seeded in a 96-well plate at the concentration of 6000 or 3000 cells/well, respectively, and were maintained in culture medium (100  $\mu$ l) 24 h before the treatment.
