# Supplementary material for: A Stable Micellar Formulation of RAD001 for Intracerebroventricular Delivery and the Treatment of Alzheimer’s Disease and Other Neurological Disorders
Source: MDPI journal article supplement (doi:10.3390/ijms242417478), 2023-12-14
Supplement: s1 [file s1]

**Table S1-** Statistics of standard solutions.

| Concentration<br>( $\mu\text{g/mL}$ ) | %C.I.*<br>( $p<0.05$ , $n=4$ ) | % Mean accuracy | % C.V.* |
|---------------------------------------|--------------------------------|-----------------|---------|
| Standard solutions                    |                                |                 |         |
| 0.625                                 | $\pm 5.1$                      | 105.1           | 3.3     |
| 1.125                                 | $\pm 4.4$                      | 98.5            | 2.7     |
| 2.5                                   | $\pm 1.8$                      | 100.3           | 1.9     |
| 5                                     | $\pm 2.7$                      | 103.2           | 2.9     |
| 10                                    | $\pm 1.1$                      | 101.4           | 1.6     |

\* %C.I., % confidence interval, C.V., coefficient of variation.

**Table S2-** Linear regression curve statistics for standard solutions, Ev-sol and Ev-mic working solutions.

|                          | Range<br>( $\mu\text{g/mL}$ ) | n | Terms | Regression curves |                |        |        |                         |
|--------------------------|-------------------------------|---|-------|-------------------|----------------|--------|--------|-------------------------|
|                          |                               |   |       | Coefficient       | Standard Error | $r^2$  | $t^*$  | $p^*$ ( $\alpha=0.05$ ) |
| Standard solutions       | 0.625-10                      | 5 | A*    | 2.5347            | 0.0000655      | 0.9992 | 82.022 | <0.0001                 |
|                          |                               |   | B*    | 10.341            | 0.00411        |        | -1.698 | 0.132                   |
| Ev-sol control solutions | 0.625-10                      | 5 | A*    | 2.3788            | 0.000563       | 0.9961 | 11.786 | 0.002                   |
|                          |                               |   | B*    | 10.877            | 0.0150         |        | -1.654 | 0.222                   |
| Ev-mic control solutions | 0.625-10                      | 5 | A*    | 2.8355            | 0.000287       | 0.9921 | 10.122 | <0.001                  |
|                          |                               |   | B*    | 11.455            | 0.0199         |        | 0.933  | 0.356                   |

\* A, slope, B, intercept,  $r^2$ , fit correlation coefficients, t, Student's t statistics, p, p-value at 95% significance level.

**Table S3-** Evaluation of inter-day and intra-day precision and accuracy.

| Concentration<br>(µg/mL)        | Intra-day (n=4) |         | Inter-day (n=4) |         |
|---------------------------------|-----------------|---------|-----------------|---------|
|                                 | % Mean accuracy | % C.V.* | % Mean accuracy | % C.V.* |
| <b>Standard solutions</b>       |                 |         |                 |         |
| 5                               | 97.3            | 2.7     | 93.3            | 4.3     |
| 10                              | 93.5            | 2.6     | 98.0            | 3.5     |
| <b>Ev-sol control solutions</b> |                 |         |                 |         |
| 5                               | 95.7            | 2.0     | 93.2            | 5.3     |
| 10                              | 91.6            | 1.9     | 103.8           | 2.9     |
| <b>Ev-mic control solutions</b> |                 |         |                 |         |
| 5                               | 91.2            | 1.0     | 95.2            | 5.6     |
| 10                              | 97.8            | 2.5     | 99.1            | 2.5     |

\*C.V.= coefficient of variation

**Table S4-** Recovery determined for standard and Ev-sol and Ev-mic working solutions.

| Concentration<br>(µg/mL)                        | Relative recovery ± S.D. (peak area ratios, n=3) |                 |                 |
|-------------------------------------------------|--------------------------------------------------|-----------------|-----------------|
|                                                 | standard                                         | Ev-sol/standard | Ev-mic/standard |
| 5                                               | 98.8± 1.5                                        | 99.4±2.6        | 100.3±3.2       |
| 10                                              | 99.3±2.8                                         | 100.6±1.9       | 98.8±2.1        |
| <b>Absolute recovery± S.D. (peak area, n=3)</b> |                                                  |                 |                 |
|                                                 | Ev-sol                                           | Ev-mic          |                 |
| 5                                               | 99.4±1.8                                         | 97.5±2.2        |                 |
| 10                                              | 101.7± 2.1                                       | 100.2±1.6       |                 |
